# Supplementary material
Source: Springer Nature journal article supplement (https://www.springermedizin.de/resource/supplementary/12943_2013_1524_MOESM2_ESM.pdf/9552454)

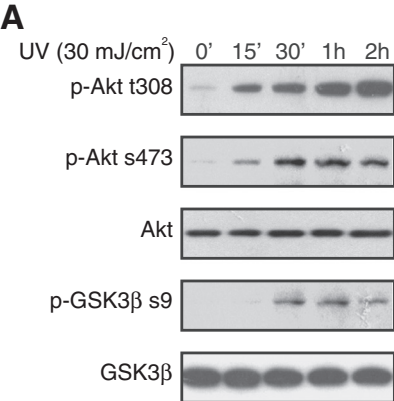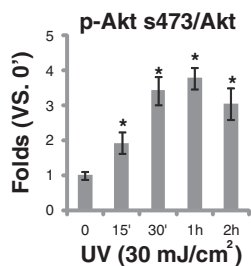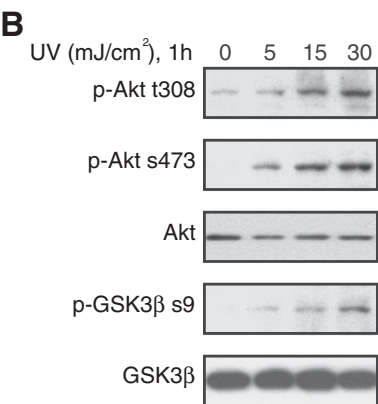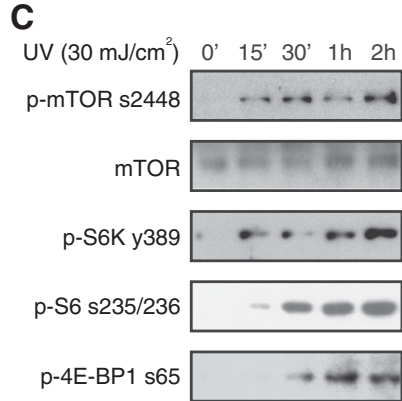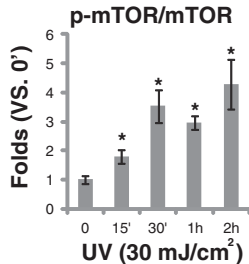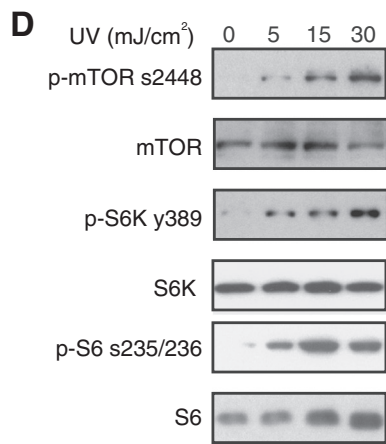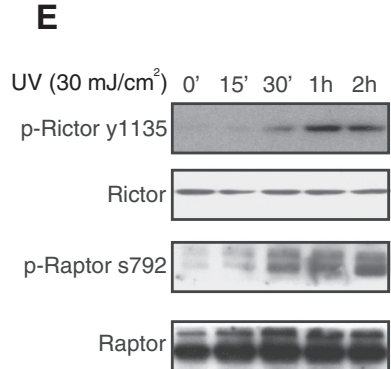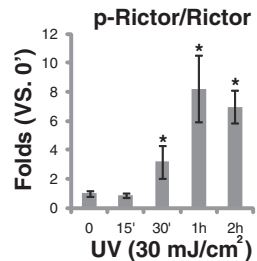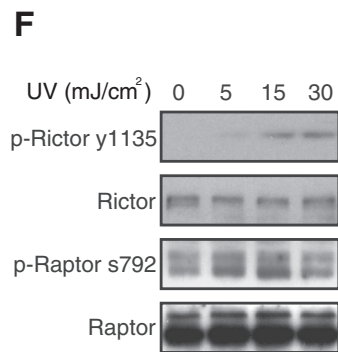

Supplement: MOESM2 [file 9552454]
